# Supplementary material for: A Molecular Dynamics Study of the Structural and Dynamical Properties of Putative Arsenic Substituted Lipid Bilayers
Source: Int J Mol Sci. 2013 Apr 9;14(4):7702–15. doi: 10.3390/ijms14047702 (PMC3645711; doi:10.3390/ijms14047702)

# Supplementary Information

**Table S1.** Parameters for DMA.

| Nonbonded Parameters                                 |                                          |                     |          |
|------------------------------------------------------|------------------------------------------|---------------------|----------|
|                                                      | $q$                                      | $\epsilon$          | $\sigma$ |
| As                                                   | 1.800                                    | -0.785              | 2.25     |
| O <sub>2A</sub>                                      | -0.875                                   | -0.135              | 1.95     |
| O <sub>SA</sub>                                      | -0.625                                   | -0.195              | 2.05     |
| Stretching Parameters                                |                                          |                     |          |
|                                                      | $K_b$ (kcal/mole-Å <sup>2</sup> )        | $b_0$ (Å)           |          |
| O <sub>2A</sub> -As                                  | 500                                      | 1.61                |          |
| O <sub>SA</sub> -As                                  | 250                                      | 1.74                |          |
| O <sub>SA</sub> -C <sub>T3</sub>                     | 330                                      | 1.40                |          |
| Bending Parameters                                   |                                          |                     |          |
|                                                      | $K_\theta$ (kcal/mole-rad <sup>2</sup> ) | $\theta_0$ (degree) |          |
| O <sub>2A</sub> -As-O <sub>2A</sub>                  | 70                                       | 126.5               |          |
| O <sub>SA</sub> -As-O <sub>2A</sub>                  | 65                                       | 106.5               |          |
| O <sub>SA</sub> -As-O <sub>SA</sub>                  | 55                                       | 98.0                |          |
| As-O <sub>SA</sub> -C <sub>T3</sub>                  | 20                                       | 117.4               |          |
| O <sub>SA</sub> -C <sub>T3</sub> -H <sub>A</sub>     | 60                                       | 109.5               |          |
| Torsion Parameters                                   |                                          |                     |          |
|                                                      | $K_\phi$ (kcal/mol)                      | $n$                 | $\delta$ |
| O <sub>SA</sub> -As-O <sub>SA</sub> -C <sub>T3</sub> | 0.55                                     | 1                   | 90       |
|                                                      | 0.85                                     | 2                   | 0        |
|                                                      | 0.60                                     | 3                   | 0        |
| O <sub>2A</sub> -As-O <sub>SA</sub> -C <sub>T3</sub> | 0.10                                     | 3                   | 0        |
| X-C <sub>T3</sub> -O <sub>SA</sub> -X                | -0.13                                    | 3                   | 0        |

**Table S2.** Vibration frequencies and potential energy distributions from the empirical and scaled HF/6-31G\* calculations for DMA <sup>a</sup>.

| Scaled HF/6-31G * |                |    |                |    | Empirical |                |    |                |    |
|-------------------|----------------|----|----------------|----|-----------|----------------|----|----------------|----|
| Freq.             | Assignment %   |    |                |    | Freq.     | Assignment %   |    |                |    |
| 70                | t(O-C)         | 91 |                |    | 74        | t(O-C)         | 86 | t(As-H)        | 15 |
| 76                | t(O-C)         | 56 | t(As-H)        | 42 | 88        | t(O-C)         | 53 | t(As-H)        | 43 |
| 98                | t(As-H)        | 89 |                |    | 140       | t(As-H)        | 75 | t(O-C)         | 12 |
|                   |                |    |                |    |           | $\beta$ O-As-O | 11 |                |    |
| 132               | t(As-H)        | 55 | t(O-C)         | 41 | 189       | t(As-H)        | 57 | t(O-C)         | 43 |
| 186               | twAs-O         | 48 | $\beta$ As-O-C | 42 | 233       | twAs-O         | 48 | $\beta$ As-O-C | 29 |
|                   |                |    |                |    |           | $\beta$ O-As-O | 15 |                |    |
| 190               | $\beta$ As-O-C | 57 | rAs-O          | 41 | 235       | rAs-O          | 51 | $\beta$ As-O-C | 35 |
|                   |                |    |                |    |           | wAs-O          | 13 |                |    |
| 281               | $\beta$ O-As-O | 45 | $\beta$ O=As=O | 42 | 292       | $\beta$ O-As-O | 73 | twAs-O         | 24 |
| 310               | twAs-O         | 43 | $\beta$ As-O-C | 38 | 293       | wAs-O          | 82 |                |    |
| 339               | wAs-O          | 82 |                |    | 358       | $\beta$ O=As=O | 69 | $\beta$ As-O-C | 23 |
| 370               | $\beta$ O=As=O | 48 | $\beta$ O-As-O | 34 | 384       | $\beta$ As-O-C | 51 | $\beta$ O=As=O | 28 |
|                   | $\beta$ As-O-C | 12 |                |    |           | twAs-O         | 20 |                |    |

Table S2. Cont.

| Scaled HF/6-31G * |                  |     |         |    | Empirical |                  |     |                  |    |
|-------------------|------------------|-----|---------|----|-----------|------------------|-----|------------------|----|
| Freq.             | Assignment %     |     |         |    | Freq.     | Assignment %     |     |                  |    |
| 394               | rAs–O            | 47  | βAs–O–C | 28 | 394       | βAs–O–C          | 60  | rAs–O            | 37 |
|                   | wAs–O            | 15  |         |    |           |                  |     |                  |    |
| 610               | vO–As            | 87  |         |    | 617       | vO–As            | 88  |                  |    |
| 622               | vO–As            | 87  |         |    | 645       | vO–As            | 88  |                  |    |
| 901               | vO=As            | 99  |         |    | 903       | vO=As            | 96  |                  |    |
| 985               | vO=As            | 99  |         |    | 1003      | vO=As            | 97  |                  |    |
| 1088              | vC–O             | 96  |         |    | 1019      | vC–O             | 81  |                  |    |
| 1098              | vC–O             | 94  |         |    | 1017      | vC–O             | 81  |                  |    |
| 1160              | rCH <sub>3</sub> | 95  |         |    | 1137      | rCH <sub>3</sub> | 75  | δCH <sub>3</sub> | 17 |
| 1162              | rCH <sub>3</sub> | 94  |         |    | 1137      | rCH <sub>3</sub> | 75  | δCH <sub>3</sub> | 17 |
| 1180              | rCH <sub>3</sub> | 90  |         |    | 1153      | rCH <sub>3</sub> | 71  | δCH <sub>3</sub> | 20 |
| 1180              | rCH <sub>3</sub> | 91  |         |    | 1156      | rCH <sub>3</sub> | 70  | δCH <sub>3</sub> | 21 |
| 1450              | δCH <sub>3</sub> | 96  |         |    | 1622      | δCH <sub>3</sub> | 90  |                  |    |
| 1451              | δCH <sub>3</sub> | 94  |         |    | 1623      | δCH <sub>3</sub> | 90  |                  |    |
| 1473              | δCH <sub>3</sub> | 92  |         |    | 1425      | δCH <sub>3</sub> | 78  | rCH <sub>3</sub> | 21 |
| 1474              | δCH <sub>3</sub> | 90  |         |    | 1426      | δCH <sub>3</sub> | 78  | rCH <sub>3</sub> | 21 |
| 1487              | δCH <sub>3</sub> | 91  |         |    | 1475      | δCH <sub>3</sub> | 76  | rCH <sub>3</sub> | 28 |
| 1489              | δCH <sub>3</sub> | 90  |         |    | 1476      | δCH <sub>3</sub> | 75  | rCH <sub>3</sub> | 28 |
| 2838              | vCH <sub>3</sub> | 93  |         |    | 2854      | vCH <sub>3</sub> | 100 |                  |    |
| 2840              | vCH <sub>3</sub> | 94  |         |    | 2854      | vCH <sub>3</sub> | 100 |                  |    |
| 2880              | vCH <sub>3</sub> | 100 |         |    | 2912      | vCH <sub>3</sub> | 100 |                  |    |
| 2880              | vCH <sub>3</sub> | 100 |         |    | 2912      | vCH <sub>3</sub> | 100 |                  |    |
| 2920              | vCH <sub>3</sub> | 93  |         |    | 2917      | vCH <sub>3</sub> | 100 |                  |    |
| 2921              | vCH <sub>3</sub> | 93  |         |    | 2917      | vCH <sub>3</sub> | 100 |                  |    |

<sup>a</sup> Frequencies in cm<sup>-1</sup>. Symbols represent; v, stretching; β, bending; w, out-of-plane deformations (wags); t, torsional deformations; r, rocking, δ, methyl group deformations, and tw twisting modes. The potential energy contribution is listed as a percentage in parentheses. Only internal coordinate contributing more than 10% to the potential energy distribution are reported.

**Figure S1.** Adiabatic torsional potential energy surface of DMA for the (a)  $O_{2A}$ -As- $O_{SA}$ - $C_{T3}$ , (b)  $O_{SA}$ -As- $O_{SA}$ - $C_{T3}$  and (c) As- $O_{SA}$ - $C_{T3}$ - $H_A$  the black solid line was the HF/6-31G \* results. The red dash line was the empirical results which fitted to the HF/6-31G \* results.

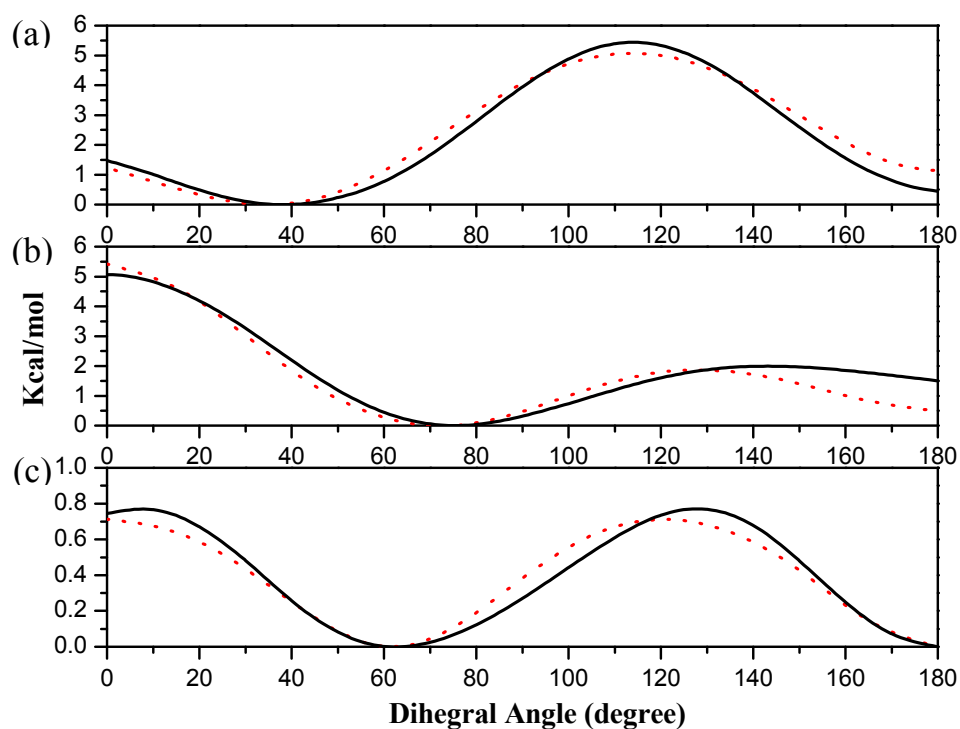

Supplement: Supplementary file 1 [file ijms-14-07702-s001.pdf]
